# Supplementary material
Source: MDPI journal article supplement (https://www.mdpi.com/2075-163X/13/12/1502)
Supplement: s1 [file s1]

## Supplementary Materials

**Table S1.** Mineral compositions and TOC content of the Wufeng–Longmaxi shale in the southern Sichuan Basin, China.

**Table S2.** Concentrations of major element oxides of the Wufeng–Longmaxi shale in the southern Sichuan Basin, China.

**Table S3.** Concentrations of trace elements (in ppm) in the Wufeng–Longmaxi shale in the southern Sichuan Basin, China.

**Table S1.** Mineral compositions and TOC content of the Wufeng–Longmaxi shale in the southern Sichuan Basin, China.

| Sample no. | Depth m | Graptolite zone | Quartz % | Calcite % | Dolomite % | Clay minerals % | K feldspar % | Plagioclase % | Pyrite % | TOC % |
|------------|---------|-----------------|----------|-----------|------------|-----------------|--------------|---------------|----------|-------|
| 1          | 3742.37 | LM6-8           | 44.53    | 2.08      | 3.49       | 42.68           | -            | 4.77          | 2.46     | 1.36  |
| 2          | 3743.01 | LM6-8           | 38.28    | 3.99      | 17.58      | 34.61           | -            | 3.62          | 1.92     | 1.04  |
| 3          | 3743.48 | LM6-8           | 34.93    | 3.64      | 15.51      | 39.65           | -            | 5.02          | 1.25     | 1.36  |
| 4          | 3744.42 | LM6-8           | 39.91    | 2.89      | 3.21       | 47.09           | -            | 4.30          | 2.60     | 0.83  |
| 5          | 3745.49 | LM6-8           | 42.71    | 3.95      | 2.92       | 43.90           | -            | 4.61          | 1.89     | 1.33  |
| 6          | 3746.4  | LM6-8           | 43.15    | 2.73      | 2.91       | 44.27           | -            | 4.99          | 1.95     | 1.52  |
| 7          | 3747.28 | LM6-8           | 40.87    | 2.47      | 2.63       | 46.45           | -            | 5.86          | 1.72     | 1.86  |
| 8          | 3748.18 | LM6-8           | 41.55    | 3.99      | 6.31       | 40.24           | -            | 5.87          | 2.04     | 1.82  |
| 9          | 3748.86 | LM6-8           | 38.66    | 3.52      | 3.98       | 44.60           | -            | 6.68          | 2.56     | 1.33  |
| 10         | 3749.38 | LM6-8           | 40.09    | 4.31      | 7.32       | 40.30           | -            | 5.98          | 2.01     | 1.51  |
| 11         | 3750.04 | LM6-8           | 43.10    | 5.12      | 4.91       | 36.16           | -            | 8.34          | 2.36     | 1.48  |
| 12         | 3750.71 | LM6-8           | 41.02    | 3.82      | 9.10       | 38.00           | -            | 6.12          | 1.94     | 1.65  |
| 13         | 3751.26 | LM6-8           | 41.97    | 4.67      | 12.43      | 33.34           | -            | 5.16          | 2.43     | 1.52  |
| 14         | 3752.01 | LM6-8           | 50.53    | 3.27      | 3.73       | 35.42           | -            | 5.45          | 1.61     | 2.27  |
| 15         | 3752.67 | LM6-8           | 45.88    | 2.71      | 4.40       | 38.48           | -            | 6.61          | 1.93     | 2.08  |
| 16         | 3753.44 | LM6-8           | 40.67    | 3.65      | 12.47      | 35.02           | -            | 6.52          | 1.67     | 1.49  |
| 17         | 3754.5  | LM6-8           | 35.87    | 2.12      | 2.60       | 47.38           | -            | 9.56          | 2.47     | 1.60  |
| 18         | 3755.28 | LM5             | 27.04    | 1.86      | 6.82       | 53.93           | 1.11         | 6.71          | 2.51     | 1.55  |
| 19         | 3756.16 | LM5             | 37.94    | 3.22      | 6.73       | 42.50           | -            | 7.14          | 2.46     | 1.52  |
| 20         | 3756.87 | LM5             | 35.28    | 3.74      | 12.64      | 35.29           | -            | 11.31         | 1.75     | 1.86  |
| 21         | 3757.77 | LM5             | 38.93    | 5.34      | 6.98       | 32.16           | 2.32         | 12.08         | 2.20     | 1.89  |
| 22         | 3758.59 | LM5             | 36.70    | 6.77      | 11.49      | 31.28           | 1.73         | 10.37         | 1.64     | 1.60  |
| 23         | 3759.26 | LM5             | 43.93    | 4.87      | 3.89       | 32.10           | 1.94         | 11.52         | 1.75     | 1.80  |
| 24         | 3759.84 | LM5             | 35.27    | 7.41      | 9.25       | 34.46           | 1.92         | 7.95          | 3.74     | 2.09  |
| 25         | 3760.6  | LM5             | 35.82    | 5.96      | 7.46       | 35.55           | 1.76         | 11.63         | 1.81     | 1.51  |
| 26         | 3761.31 | LM5             | 19.95    | 54.69     | 17.09      | 4.04            | -            | 3.81          | 0.42     | 1.16  |
| 27         | 3762.27 | LM5             | 44.16    | 3.46      | 3.68       | 34.22           | 2.36         | 10.28         | 1.84     | 1.90  |
| 28         | 3762.99 | LM5             | 38.25    | 7.10      | 6.71       | 31.43           | 2.32         | 11.51         | 2.67     | 2.06  |
| 29         | 3763.79 | LM5             | 40.34    | 7.86      | 8.04       | 28.46           | 2.23         | 11.59         | 1.49     | 1.34  |
| 30         | 3764.44 | LM5             | 38.26    | 6.08      | 6.35       | 34.70           | 1.25         | 11.59         | 1.78     | 1.53  |
| 31         | 3765.39 | LM5             | 41.96    | 7.64      | 5.94       | 27.96           | 1.49         | 12.82         | 2.19     | 1.96  |

|    |         |       |       |       |       |       |      |       |       |      |
|----|---------|-------|-------|-------|-------|-------|------|-------|-------|------|
| 32 | 3766.23 | LM5   | 37.79 | 6.34  | 6.03  | 35.46 | 1.70 | 10.74 | 1.95  | 2.16 |
| 33 | 3767.01 | LM4   | 40.34 | 6.34  | 5.80  | 34.53 | 2.03 | 9.25  | 1.71  | 0.92 |
| 34 | 3767.57 | LM4   | 44.77 | 4.34  | 4.10  | 36.11 | 0.94 | 8.29  | 1.45  | 1.93 |
| 35 | 3768.41 | LM4   | 56.42 | 1.96  | 3.82  | 29.37 | -    | 6.09  | 2.34  | 2.13 |
| 36 | 3769.54 | LM4   | 62.68 | 1.90  | 4.27  | 24.99 | -    | 3.44  | 2.73  | 2.55 |
| 37 | 3770.45 | LM4   | 54.03 | 1.79  | 3.82  | 30.83 | 1.15 | 5.74  | 2.64  | 3.02 |
| 38 | 3771.34 | LM4   | 47.49 | 1.84  | 3.31  | 37.83 | -    | 5.50  | 4.02  | 2.58 |
| 39 | 3772.22 | LM4   | 56.28 | 2.47  | 2.74  | 30.66 | -    | 4.65  | 3.19  | 3.45 |
| 40 | 3772.64 | LM4   | 60.27 | 3.82  | 7.15  | 21.58 | 1.27 | 3.05  | 2.85  | 2.90 |
| 41 | 3773.67 | LM4   | 64.67 | 2.34  | 4.21  | 21.94 | 1.23 | 3.91  | 1.70  | 3.45 |
| 42 | 3774.7  | LM4   | 50.13 | 1.94  | 4.75  | 34.89 | 0.94 | 4.98  | 2.37  | 3.40 |
| 43 | 3775.36 | LM4   | 68.92 | 2.67  | 4.78  | 18.71 | -    | 3.12  | 1.81  | 2.46 |
| 44 | 3776.05 | LM4   | 6.91  | -     | -     | 81.39 | -    | 10.67 | 1.04  | 3.70 |
| 45 | 3776.96 | LM4   | 62.72 | 5.67  | 7.28  | 19.55 | -    | 2.58  | 2.19  | 3.35 |
| 46 | 3777.72 | LM4   | 67.50 | 3.99  | 9.05  | 14.79 | 0.83 | 2.56  | 1.27  | 3.25 |
| 47 | 3778.66 | LM4   | 63.38 | 5.57  | 5.33  | 19.10 | -    | 3.18  | 3.43  | 3.39 |
| 48 | 3779.13 | LM2-3 | 67.22 | 5.48  | 9.17  | 14.25 | -    | 2.28  | 1.60  | 3.11 |
| 49 | 3779.9  | LM2-3 | 54.47 | 8.84  | 12.32 | 17.72 | -    | 3.74  | 2.91  | 4.52 |
| 50 | 3780.45 | LM2-3 | 62.10 | 8.46  | 19.13 | 7.45  | -    | 1.63  | 1.23  | 3.33 |
| 51 | 3781.45 | LM2-3 | 30.51 | 2.04  | 4.68  | 49.21 | -    | 3.42  | 10.14 | 2.71 |
| 52 | 3781.9  | LM2-3 | 63.32 | 8.76  | 10.39 | 13.38 | -    | 2.17  | 1.97  | 1.86 |
| 53 | 3782.72 | LM2-3 | 29.25 | 6.66  | 40.63 | 18.35 | -    | 2.67  | 2.44  | 3.54 |
| 54 | 3783.72 | LM1   | 52.08 | 11.36 | 14.18 | 19.66 | -    | 2.09  | 0.62  | 2.69 |
| 55 | 3784.33 | LM1   | 71.76 | 0.74  | 6.44  | 17.19 | 0.64 | 2.03  | 1.20  | 3.45 |
| 56 | 3784.53 | LM1   | 63.49 | 4.04  | 14.24 | 15.09 | -    | 2.39  | 0.75  | 1.45 |
| 57 | 3785.13 | LM1   | 42.76 | 5.70  | 12.26 | 34.36 | -    | 3.65  | 1.25  | 3.06 |
| 58 | 3785.78 | LM1   | 54.20 | 7.23  | 5.44  | 29.97 | -    | 2.15  | 1.01  | 2.69 |
| 59 | 3786.28 | WF4   | 39.38 | 4.66  | 15.49 | 35.41 | -    | 4.16  | 0.90  | 1.79 |
| 60 | 3787.19 | WF3   | 35.40 | 8.48  | 21.50 | 29.66 | -    | 3.42  | 1.54  | 1.01 |
| 61 | 3788.2  | WF3   | 29.46 | 13.70 | 8.55  | 41.71 | 0.81 | 4.96  | 0.81  | 0.34 |
| 62 | 3789.18 | WF3   | 29.79 | 12.59 | 11.71 | 39.26 | 0.67 | 5.13  | 0.84  | 0.47 |
| 63 | 3789.56 | WF3   | 34.33 | 10.40 | 3.16  | 44.61 | 1.01 | 5.20  | 1.28  | 0.42 |
| 64 | 3789.8  | WF2   | 37.20 | 11.83 | 6.05  | 38.85 | -    | 6.07  | -     | 0.15 |
| 65 | 3790.98 | WF2   | 45.47 | 9.27  | 5.34  | 33.71 | -    | 6.21  | -     | 0.10 |
| 66 | 3791.34 | WF2   | 54.54 | 8.58  | 3.58  | 28.97 | -    | 4.33  | -     | 0.05 |
| 67 | 3791.52 | WF2   | 34.94 | 12.43 | 8.27  | 40.09 | -    | 4.28  | -     | 0.12 |

|         |         |     |       |       |      |       |      |      |      |      |
|---------|---------|-----|-------|-------|------|-------|------|------|------|------|
| 68      | 3791.92 | WF2 | 23.41 | 37.48 | 2.16 | 30.38 | 0.77 | 5.79 | -    | 0.10 |
| 69      | 3792.3  | WF2 | 14.79 | 72.17 | 0.44 | 10.25 | -    | 2.35 | -    | 0.10 |
| Average |         |     | 43.94 | 7.48  | 7.94 | 32.56 | 0.50 | 5.91 | 2.07 | 1.91 |

**Table S2.** Concentrations of major element oxides of the Wufeng–Longmaxi shale in the southern Sichuan Basin, China.

| Sample no. | Depth   | Graptolite zone | SiO <sub>2</sub> % | Al <sub>2</sub> O <sub>3</sub> % | CaO % | Fe <sub>2</sub> O <sub>3T</sub> % | K <sub>2</sub> O % | MgO % | MnO % | Na <sub>2</sub> O % | P <sub>2</sub> O <sub>5</sub> % | TiO <sub>2</sub> % | LOI % | K <sub>2</sub> O/Na <sub>2</sub> O | SiO <sub>2</sub> /Al <sub>2</sub> O <sub>3</sub> | CIA   | ICV  |
|------------|---------|-----------------|--------------------|----------------------------------|-------|-----------------------------------|--------------------|-------|-------|---------------------|---------------------------------|--------------------|-------|------------------------------------|--------------------------------------------------|-------|------|
| 1          | 3742.37 | LM6-8           | 60.52              | 15.81                            | 2.16  | 5.37                              | 3.75               | 2.57  | 0.03  | 0.78                | 0.1                             | 0.55               | 8.28  | 4.81                               | 3.83                                             | 70.44 | 1.10 |
| 2          | 3743.01 | LM6-8           | 55.53              | 13.78                            | 5.5   | 5.29                              | 3.44               | 3.65  | 0.06  | 0.68                | 0.09                            | 0.5                | 11.31 | 5.06                               | 4.03                                             | 69.77 | 1.41 |
| 3          | 3743.48 | LM6-8           | 54.78              | 14.28                            | 5.09  | 5.61                              | 3.62               | 3.61  | 0.06  | 0.69                | 0.1                             | 0.51               | 11.17 | 5.25                               | 3.84                                             | 69.73 | 1.38 |
| 4          | 3744.42 | LM6-8           | 59.86              | 15.42                            | 2.51  | 5.34                              | 3.86               | 2.67  | 0.03  | 0.76                | 0.11                            | 0.57               | 8.79  | 5.08                               | 3.88                                             | 69.74 | 1.15 |
| 5          | 3745.49 | LM6-8           | 55.52              | 14.37                            | 4.81  | 5.67                              | 3.58               | 3.33  | 0.06  | 0.69                | 0.1                             | 0.52               | 10.86 | 5.19                               | 3.86                                             | 70.01 | 1.32 |
| 6          | 3746.4  | LM6-8           | 57.43              | 14.73                            | 3.98  | 5.12                              | 3.75               | 3.16  | 0.05  | 0.68                | 0.09                            | 0.53               | 9.99  | 5.51                               | 3.90                                             | 70.02 | 1.25 |
| 7          | 3747.28 | LM6-8           | 59.45              | 16.38                            | 2.18  | 5.54                              | 3.97               | 2.77  | 0.03  | 0.72                | 0.1                             | 0.55               | 8.28  | 5.51                               | 3.63                                             | 71.04 | 1.10 |
| 8          | 3748.18 | LM6-8           | 60.61              | 15.57                            | 2.15  | 5.63                              | 3.73               | 2.58  | 0.03  | 0.8                 | 0.11                            | 0.55               | 8.22  | 4.66                               | 3.89                                             | 69.98 | 1.13 |
| 9          | 3748.86 | LM6-8           | 59.32              | 14.93                            | 3.28  | 5.35                              | 3.7                | 2.83  | 0.04  | 0.81                | 0.1                             | 0.57               | 9.01  | 4.57                               | 3.97                                             | 69.09 | 1.21 |
| 10         | 3749.38 | LM6-8           | 58.84              | 15.75                            | 2.92  | 5.46                              | 3.89               | 2.82  | 0.03  | 0.78                | 0.09                            | 0.55               | 8.62  | 4.99                               | 3.74                                             | 69.88 | 1.16 |
| 11         | 3750.04 | LM6-8           | 58.62              | 14.36                            | 3.89  | 5.2                               | 3.51               | 3.02  | 0.04  | 0.75                | 0.1                             | 0.52               | 9.9   | 4.68                               | 4.08                                             | 69.59 | 1.25 |
| 12         | 3750.71 | LM6-8           | 59.13              | 15                               | 3.13  | 5.35                              | 3.46               | 2.78  | 0.04  | 0.87                | 0.11                            | 0.55               | 9.24  | 3.98                               | 3.94                                             | 69.39 | 1.19 |
| 13         | 3751.26 | LM6-8           | 58.71              | 14.57                            | 3.55  | 5.43                              | 3.61               | 3.01  | 0.04  | 0.82                | 0.1                             | 0.57               | 9.54  | 4.40                               | 4.03                                             | 68.77 | 1.27 |
| 14         | 3752.01 | LM6-8           | 61.76              | 14.55                            | 2.28  | 5                                 | 3.56               | 2.39  | 0.03  | 0.79                | 0.11                            | 0.55               | 8.71  | 4.51                               | 4.24                                             | 69.25 | 1.13 |
| 15         | 3752.67 | LM6-8           | 64.36              | 13.61                            | 2.31  | 4.36                              | 3.39               | 2.23  | 0.03  | 0.7                 | 0.1                             | 0.52               | 8.32  | 4.84                               | 4.73                                             | 69.47 | 1.11 |
| 16         | 3753.44 | LM6-8           | 61.23              | 14.31                            | 3.01  | 5.02                              | 3.51               | 2.77  | 0.04  | 0.81                | 0.09                            | 0.53               | 8.62  | 4.33                               | 4.28                                             | 68.85 | 1.22 |
| 17         | 3754.5  | LM6-8           | 58.02              | 15.62                            | 3.09  | 5.62                              | 3.78               | 3     | 0.04  | 0.97                | 0.1                             | 0.6                | 8.84  | 3.90                               | 3.71                                             | 68.17 | 1.24 |
| 18         | 3755.28 | LM5             | 51.57              | 13.6                             | 6.65  | 5.88                              | 3.36               | 4.43  | 0.08  | 0.95                | 0.1                             | 0.56               | 12.78 | 3.54                               | 3.79                                             | 66.76 | 1.67 |
| 19         | 3756.16 | LM5             | 58.8               | 13.6                             | 5.05  | 4.58                              | 3.01               | 2.81  | 0.04  | 1.41                | 0.12                            | 0.59               | 9.54  | 2.13                               | 4.32                                             | 63.24 | 1.38 |
| 20         | 3756.87 | LM5             | 54.95              | 14.91                            | 4.72  | 5.52                              | 3.56               | 3.28  | 0.05  | 1.17                | 0.11                            | 0.63               | 10.65 | 3.04                               | 3.69                                             | 65.91 | 1.37 |
| 21         | 3757.77 | LM5             | 57.06              | 15.53                            | 3.97  | 5.27                              | 3.69               | 3.03  | 0.04  | 1.06                | 0.11                            | 0.59               | 9.54  | 3.48                               | 3.67                                             | 67.46 | 1.25 |
| 22         | 3758.59 | LM5             | 58.57              | 13.94                            | 4.91  | 4.59                              | 3.17               | 2.84  | 0.04  | 1.36                | 0.11                            | 0.59               | 9.6   | 2.33                               | 4.20                                             | 63.79 | 1.36 |
| 23         | 3759.26 | LM5             | 58.47              | 13                               | 5.91  | 4.19                              | 3.03               | 2.78  | 0.04  | 1.23                | 0.12                            | 0.56               | 10.35 | 2.46                               | 4.50                                             | 63.93 | 1.37 |
| 24         | 3759.84 | LM5             | 57.98              | 13.28                            | 5.79  | 4.35                              | 3.12               | 2.93  | 0.05  | 1.26                | 0.11                            | 0.58               | 10.41 | 2.48                               | 4.37                                             | 63.81 | 1.40 |
| 25         | 3760.6  | LM5             | 57.88              | 14.21                            | 5.25  | 4.51                              | 3.34               | 2.92  | 0.04  | 1.24                | 0.11                            | 0.6                | 9.76  | 2.69                               | 4.07                                             | 64.84 | 1.33 |
| 26         | 3761.31 | LM5             | 56.78              | 17.08                            | 3.84  | 4.96                              | 3.89               | 2.83  | 0.04  | 1.18                | 0.14                            | 0.56               | 8.44  | 3.30                               | 3.32                                             | 67.82 | 1.13 |
| 27         | 3762.27 | LM5             | 55.14              | 13.96                            | 5.99  | 5.11                              | 3.43               | 3.3   | 0.07  | 1.08                | 0.11                            | 0.6                | 11.04 | 3.18                               | 3.95                                             | 65.74 | 1.42 |
| 28         | 3762.99 | LM5             | 59.02              | 13.15                            | 5.11  | 4.52                              | 3.19               | 2.72  | 0.04  | 0.99                | 0.1                             | 0.55               | 10.42 | 3.22                               | 4.49                                             | 66.18 | 1.32 |
| 29         | 3763.79 | LM5             | 58.41              | 13.18                            | 5.29  | 4.96                              | 3                  | 2.62  | 0.04  | 1.3                 | 0.11                            | 0.58               | 10.08 | 2.31                               | 4.43                                             | 63.63 | 1.38 |
| 30         | 3764.44 | LM5             | 59.03              | 13.34                            | 5.37  | 4.5                               | 3.03               | 2.71  | 0.04  | 1.27                | 0.11                            | 0.58               | 9.75  | 2.39                               | 4.43                                             | 64.11 | 1.35 |
| 31         | 3765.39 | LM5             | 58.9               | 13.57                            | 4.73  | 4.76                              | 3.13               | 2.63  | 0.04  | 1.28                | 0.1                             | 0.59               | 9.78  | 2.45                               | 4.34                                             | 64.08 | 1.34 |
| 32         | 3766.23 | LM5             | 59.93              | 13.02                            | 4.39  | 5.09                              | 3.03               | 2.43  | 0.04  | 1.13                | 0.1                             | 0.57               | 10.17 | 2.68                               | 4.60                                             | 65.02 | 1.32 |
| 33         | 3767.01 | LM4             | 36.01              | 14.1                             | 1.18  | 26.46                             | 3.19               | 1.37  | 0.02  | 0.68                | 0.06                            | 0.27               | 16.34 | 4.69                               | 2.55                                             | 71.22 | 1.87 |
| 34         | 3767.57 | LM4             | 64.8               | 12.38                            | 3.02  | 4.64                              | 2.77               | 1.95  | 0.03  | 0.99                | 0.09                            | 0.48               | 8.71  | 2.80                               | 5.23                                             | 66.41 | 1.20 |
| 35         | 3768.41 | LM4             | 53.21              | 10.43                            | 1.6   | 16.32                             | 2.33               | 1.48  | 0.03  | 0.69                | 0.08                            | 0.38               | 13.35 | 3.38                               | 5.10                                             | 68.49 | 1.87 |

|         |         |       |       |       |       |       |      |      |      |      |      |      |       |      |       |       |      |
|---------|---------|-------|-------|-------|-------|-------|------|------|------|------|------|------|-------|------|-------|-------|------|
| 36      | 3769.54 | LM4   | 70.47 | 9.63  | 2.13  | 3.46  | 2.31 | 1.68 | 0.03 | 0.72 | 0.09 | 0.39 | 8.78  | 3.21 | 7.32  | 66.39 | 1.24 |
| 37      | 3770.45 | LM4   | 62.86 | 12.38 | 3.24  | 3.96  | 2.96 | 2.24 | 0.03 | 0.92 | 0.1  | 0.51 | 10.31 | 3.22 | 5.08  | 66.49 | 1.23 |
| 38      | 3771.34 | LM4   | 54.13 | 16.58 | 1.91  | 8.52  | 3.99 | 2.23 | 0.04 | 0.82 | 0.08 | 0.54 | 10.95 | 4.87 | 3.26  | 70.23 | 1.14 |
| 39      | 3772.22 | LM4   | 58.59 | 13.32 | 1.9   | 7.79  | 3.23 | 1.99 | 0.03 | 0.84 | 0.11 | 0.5  | 11.68 | 3.85 | 4.40  | 68.00 | 1.28 |
| 40      | 3772.64 | LM4   | 66.84 | 11.49 | 2.01  | 4.27  | 2.82 | 1.57 | 0.02 | 0.73 | 0.09 | 0.41 | 9.51  | 3.86 | 5.82  | 67.78 | 1.11 |
| 41      | 3773.67 | LM4   | 66.41 | 9.17  | 3.6   | 3.97  | 2.15 | 1.81 | 0.03 | 0.59 | 0.15 | 0.35 | 11.65 | 3.64 | 7.24  | 68.21 | 1.30 |
| 42      | 3774.7  | LM4   | 72.65 | 8.46  | 2.26  | 2.57  | 2.01 | 1.33 | 0.02 | 0.53 | 0.08 | 0.31 | 9.61  | 3.79 | 8.59  | 68.31 | 1.11 |
| 43      | 3775.36 | LM4   | 61.75 | 13.58 | 2.3   | 4.24  | 3.36 | 2.17 | 0.03 | 0.83 | 0.1  | 0.51 | 10.82 | 4.05 | 4.55  | 68.05 | 1.13 |
| 44      | 3776.05 | LM4   | 67.49 | 6.33  | 6.02  | 2.42  | 1.43 | 2.45 | 0.04 | 0.41 | 0.11 | 0.24 | 12.72 | 3.49 | 10.66 | 68.58 | 1.75 |
| 45      | 3776.96 | LM4   | 68.09 | 8.34  | 4.83  | 2.54  | 1.89 | 1.91 | 0.03 | 0.52 | 0.09 | 0.3  | 11.45 | 3.63 | 8.16  | 68.92 | 1.28 |
| 46      | 3777.72 | LM4   | 67.54 | 8.05  | 5.27  | 2.9   | 1.99 | 1.87 | 0.04 | 0.54 | 0.1  | 0.32 | 11.39 | 3.69 | 8.39  | 67.16 | 1.37 |
| 47      | 3778.66 | LM4   | 68.18 | 7.6   | 4.87  | 2.86  | 1.71 | 1.86 | 0.03 | 0.48 | 0.09 | 0.28 | 11.73 | 3.56 | 8.97  | 68.87 | 1.37 |
| 48      | 3779.13 | LM2-3 | 65.69 | 8.47  | 4.71  | 3.96  | 2    | 1.81 | 0.03 | 0.56 | 0.09 | 0.33 | 11.86 | 3.57 | 7.76  | 67.85 | 1.37 |
| 49      | 3779.9  | LM2-3 | 67.31 | 7.25  | 5.89  | 2.6   | 1.68 | 1.97 | 0.03 | 0.5  | 0.07 | 0.28 | 12.32 | 3.36 | 9.28  | 67.64 | 1.46 |
| 50      | 3780.45 | LM2-3 | 59.92 | 8.32  | 7.69  | 3.8   | 2.05 | 2.72 | 0.04 | 0.59 | 0.1  | 0.34 | 13.97 | 3.47 | 7.20  | 66.64 | 1.68 |
| 51      | 3781.45 | LM2-3 | 70.48 | 6.24  | 6.09  | 1.91  | 1.41 | 1.95 | 0.03 | 0.47 | 0.07 | 0.24 | 10.91 | 3.00 | 11.29 | 66.98 | 1.54 |
| 52      | 3781.9  | LM2-3 | 45.11 | 20.04 | 2.56  | 12.17 | 4.78 | 2.08 | 0.05 | 0.64 | 0.06 | 0.31 | 11.91 | 7.47 | 2.25  | 73.32 | 1.04 |
| 53      | 3782.72 | LM2-3 | 57.79 | 6.7   | 10.56 | 2.73  | 1.51 | 3.75 | 0.05 | 0.48 | 0.09 | 0.26 | 15.69 | 3.15 | 8.63  | 67.55 | 2.23 |
| 54      | 3783.72 | LM1   | 61.8  | 9.29  | 7.44  | 3.13  | 2.29 | 2.24 | 0.04 | 0.49 | 0.12 | 0.34 | 12.76 | 4.67 | 6.65  | 69.39 | 1.32 |
| 55      | 3784.33 | LM1   | 57.8  | 8.08  | 9.38  | 2.4   | 2.15 | 3    | 0.06 | 0.41 | 0.09 | 0.41 | 16.1  | 5.24 | 7.15  | 68.70 | 1.67 |
| 56      | 3784.53 | LM1   | 71.7  | 8.22  | 2.36  | 2.91  | 1.89 | 1.75 | 0.03 | 0.48 | 0.1  | 0.31 | 10.05 | 3.94 | 8.72  | 69.37 | 1.26 |
| 57      | 3785.13 | LM1   | 67.2  | 6.95  | 6.03  | 2.6   | 1.82 | 2.67 | 0.06 | 0.42 | 0.09 | 0.3  | 11.82 | 4.33 | 9.67  | 67.43 | 1.77 |
| 58      | 3785.78 | LM1   | 56    | 12.16 | 6.25  | 3.57  | 3.27 | 3.13 | 0.06 | 0.56 | 0.1  | 0.48 | 14.03 | 5.84 | 4.61  | 69.28 | 1.34 |
| 59      | 3786.28 | WF4   | 62.45 | 10.68 | 6.31  | 3.26  | 2.8  | 2.46 | 0.06 | 0.44 | 0.22 | 0.43 | 10.65 | 6.36 | 5.85  | 70.42 | 1.26 |
| 60      | 3787.19 | WF3   | 53.69 | 13.29 | 6.79  | 4.22  | 3.49 | 4.04 | 0.09 | 0.68 | 0.09 | 0.55 | 12.6  | 5.13 | 4.04  | 68.81 | 1.49 |
| 61      | 3788.2  | WF3   | 50.25 | 10.66 | 10.91 | 4.69  | 2.83 | 4.27 | 0.22 | 0.59 | 0.29 | 0.49 | 14.7  | 4.80 | 4.71  | 68.02 | 1.86 |
| 62      | 3789.18 | WF3   | 48.96 | 14.08 | 9.7   | 5.14  | 3.63 | 3.35 | 0.13 | 0.8  | 0.1  | 0.64 | 13.16 | 4.54 | 3.48  | 68.18 | 1.38 |
| 63      | 3789.56 | WF3   | 47.4  | 13.05 | 10.72 | 5.46  | 3.28 | 3.69 | 0.19 | 0.8  | 0.08 | 0.61 | 14.36 | 4.10 | 3.63  | 67.82 | 1.54 |
| 64      | 3789.8  | WF2   | 54.62 | 15.67 | 5.88  | 5.57  | 4.12 | 2.93 | 0.11 | 0.85 | 0.07 | 0.7  | 9.28  | 4.85 | 3.49  | 68.32 | 1.23 |
| 65      | 3790.98 | WF2   | 54.51 | 13.42 | 8.32  | 4.46  | 3.39 | 3.09 | 0.15 | 0.84 | 0.06 | 0.66 | 10.79 | 4.04 | 4.06  | 67.56 | 1.36 |
| 66      | 3791.34 | WF2   | 59.16 | 13.14 | 6.32  | 4.53  | 3.33 | 2.66 | 0.11 | 0.79 | 0.05 | 0.62 | 8.98  | 4.22 | 4.50  | 67.90 | 1.28 |
| 67      | 3791.52 | WF2   | 63.89 | 12.03 | 5.06  | 4.44  | 2.97 | 2.36 | 0.09 | 0.69 | 0.06 | 0.53 | 7.76  | 4.30 | 5.31  | 68.65 | 1.26 |
| 68      | 3791.92 | WF2   | 54.92 | 14.38 | 7.61  | 4.23  | 3.74 | 2.92 | 0.14 | 0.77 | 0.05 | 0.59 | 10.25 | 4.86 | 3.82  | 68.57 | 1.23 |
| 69      | 3792.3  | WF2   | 41.64 | 11.96 | 18.53 | 3.31  | 3.03 | 2.17 | 0.14 | 0.75 | 0.05 | 0.54 | 17.48 | 4.04 | 3.48  | 67.51 | 1.19 |
| Average |         |       | 59.09 | 12.58 | 4.99  | 5.09  | 3.05 | 2.64 | 0.05 | 0.80 | 0.10 | 0.49 | 10.88 | 4.03 | 5.14  | 67.95 | 1.35 |
| PAAS    |         |       | 62.8  | 18.9  | 1.3   | 7.2   | 3.7  | -    | 2.2  | 1.2  | 0.16 | 1    | -     | 3.08 | 3.32  | 70.36 | 0.90 |
| NASC    |         |       | 64.8  | 16.9  | 3.63  | -     | 3.97 | 2.86 | 0.06 | 1.14 | -    | 0.7  | -     | -    | -     | -     | -    |

**Table S3.** Concentrations of trace elements (in ppm) in the Wufeng–Longmaxi shale in the southern Sichuan Basin, China.

| Elem<br>ent | Sample no. |      |      |       |      |       |      |       |      |      |      |      |      |       |       |       |       |       |       |       |       |       |       |       |
|-------------|------------|------|------|-------|------|-------|------|-------|------|------|------|------|------|-------|-------|-------|-------|-------|-------|-------|-------|-------|-------|-------|
|             | 1          | 2    | 3    | 4     | 5    | 6     | 7    | 8     | 9    | 10   | 11   | 12   | 13   | 14    | 15    | 16    | 17    | 18    | 19    | 20    | 21    | 22    | 23    | 24    |
| Li          | 45.4       | 41.4 | 38.4 | 44.45 | 40.9 | 40.96 | 46.5 | 43.26 | 44.6 | 45.0 | 39.8 | 43.3 | 43.3 | 41.62 | 39.33 | 40.08 | 40.54 | 38.21 | 36.25 | 35.99 | 37.92 | 38.22 | 35.61 | 34.44 |
| Be          | 3.12       | 2.97 | 3.03 | 3.28  | 3.00 | 3.12  | 3.30 | 2.97  | 2.93 | 3.26 | 2.93 | 2.92 | 3.01 | 3.05  | 2.98  | 2.86  | 2.93  | 2.76  | 2.68  | 3.17  | 3.26  | 2.78  | 2.62  | 2.59  |
| Sc          | 12.2       | 11.5 | 6.43 | 10.58 | 10.5 | 8.15  | 11.0 | 10.87 | 12.5 | 12.1 | 10.3 | 12.2 | 11.1 | 10.08 | 10.22 | 11.05 | 12.04 | 12.36 | 8.71  | 10.09 | 10.64 | 10.69 | 8.68  | 7.79  |
| V           | 128        | 136  | 134  | 163.5 | 127  | 144.9 | 144  | 130.6 | 134  | 132  | 120  | 123  | 136  | 127.1 | 111.4 | 132.7 | 138.5 | 114.0 | 116.0 | 138.1 | 155.9 | 126.6 | 92.00 | 108.0 |
| Cr          | 76.2       | 71.7 | 61.0 | 73.82 | 66.5 | 64.61 | 76.0 | 73.01 | 81.5 | 73.6 | 66.3 | 73.0 | 75.9 | 69.73 | 66.73 | 68.18 | 73.67 | 78.75 | 59.68 | 69.10 | 71.78 | 65.61 | 56.57 | 60.82 |
| Mn          | 173        | 434  | 361  | 173.0 | 384  | 275.0 | 173  | 157.7 | 219  | 203  | 253  | 207  | 239  | 149.6 | 139.3 | 219.4 | 211.9 | 515.2 | 252.3 | 257.9 | 219.2 | 253.9 | 257.2 | 264.0 |
| Co          | 15.9       | 13.7 | 13.5 | 15.32 | 14.1 | 13.77 | 15.1 | 15.10 | 15.4 | 15.0 | 14.7 | 15.7 | 15.0 | 15.76 | 13.54 | 14.54 | 15.37 | 13.07 | 12.74 | 14.56 | 14.61 | 13.24 | 12.00 | 12.30 |
| Ni          | 53.3       | 65.0 | 66.6 | 79.75 | 57.9 | 66.49 | 72.9 | 63.91 | 70.1 | 56.6 | 50.4 | 55.9 | 67.4 | 49.17 | 38.67 | 62.53 | 68.63 | 65.00 | 59.65 | 73.67 | 79.98 | 66.17 | 37.86 | 58.11 |
| Cu          | 54.2       | 45.7 | 51.3 | 59.13 | 51.9 | 48.56 | 51.7 | 51.12 | 50.4 | 53.1 | 49.2 | 52.3 | 49.2 | 53.73 | 51.61 | 50.56 | 53.49 | 42.65 | 34.98 | 49.95 | 50.38 | 40.18 | 33.53 | 36.16 |
| Zn          | 104        | 255  | 103  | 206.5 | 101  | 95.47 | 127  | 105.2 | 85.2 | 72.4 | 91.7 | 100  | 140  | 97.50 | 70.13 | 99.73 | 115.5 | 113.0 | 92.45 | 86.62 | 308.4 | 96.67 | 46.49 | 87.08 |
| Ga          | 19.9       | 19.1 | 16.8 | 19.27 | 18.3 | 18.14 | 19.8 | 19.20 | 20.3 | 20.9 | 17.9 | 19.6 | 18.6 | 18.42 | 17.79 | 18.22 | 19.23 | 18.35 | 16.48 | 17.84 | 18.84 | 18.64 | 16.06 | 15.76 |
| Rb          | 95.7       | 139  | 45.1 | 48.96 | 75.7 | 47.75 | 61.2 | 57.90 | 114  | 97.1 | 80.5 | 123  | 89.7 | 61.76 | 114.4 | 103.8 | 118.8 | 152.3 | 66.63 | 52.97 | 53.27 | 115.9 | 75.21 | 73.00 |
| Sr          | 107        | 172  | 131  | 96.65 | 144  | 116.4 | 100  | 96.82 | 132  | 124  | 119  | 126  | 122  | 99.15 | 103.1 | 116.5 | 119.3 | 187.2 | 144.2 | 118.6 | 107.6 | 157.5 | 153.8 | 147.1 |
| Y           | 21.2       | 23.1 | 19.7 | 21.55 | 23.1 | 22.05 | 20.3 | 20.34 | 22.4 | 22.5 | 21.0 | 22.6 | 21.9 | 21.69 | 23.61 | 24.64 | 22.08 | 26.36 | 27.65 | 27.24 | 25.03 | 28.71 | 26.55 | 26.00 |
| Zr          | 93.4       | 90.7 | 86.9 | 90.27 | 81.5 | 90.39 | 84.7 | 88.45 | 101  | 119  | 94.0 | 105  | 106  | 105.9 | 104.2 | 104.2 | 121.8 | 88.41 | 223.3 | 181.8 | 172.9 | 210.2 | 186.7 | 201.7 |
| Nb          | 14.0       | 13.6 | 12.2 | 12.93 | 11.9 | 13.01 | 13.1 | 12.75 | 15.6 | 16.6 | 12.8 | 13.5 | 13.2 | 14.36 | 14.49 | 12.31 | 12.91 | 12.53 | 13.56 | 14.54 | 14.80 | 14.09 | 13.19 | 12.79 |
| Sn          | 3.68       | 3.51 | 3.30 | 3.55  | 3.20 | 3.37  | 3.52 | 3.46  | 3.31 | 3.56 | 3.27 | 3.23 | 3.31 | 3.37  | 3.02  | 3.43  | 3.15  | 2.87  | 2.90  | 3.26  | 3.18  | 3.14  | 2.84  | 2.79  |
| Cs          | 9.91       | 11.8 | 8.90 | 8.03  | 10.5 | 9.42  | 8.76 | 8.19  | 11.5 | 10.8 | 10.0 | 11.3 | 10.3 | 8.47  | 10.83 | 10.43 | 10.95 | 10.97 | 8.32  | 8.96  | 8.96  | 9.86  | 8.48  | 8.47  |
| Ba          | 2564       | 2908 | 2020 | 2490  | 2654 | 2191  | 2603 | 2373  | 2736 | 2734 | 2443 | 2631 | 2428 | 2458  | 2570  | 2459  | 2527  | 2646  | 1931  | 1803  | 2045  | 2287  | 1799  | 1649  |
| La          | 35.4       | 39.2 | 22.5 | 30.67 | 32.2 | 27.10 | 34.0 | 33.49 | 39.4 | 38.7 | 33.5 | 37.9 | 35.8 | 34.28 | 35.67 | 34.61 | 38.35 | 42.93 | 32.57 | 33.70 | 36.15 | 41.45 | 34.38 | 31.92 |
| Ce          | 73.4       | 77.3 | 59.5 | 68.36 | 68.9 | 64.68 | 72.9 | 69.60 | 81.0 | 81.5 | 70.2 | 74.5 | 72.8 | 72.06 | 65.84 | 69.50 | 76.19 | 80.83 | 73.32 | 71.58 | 73.90 | 84.41 | 77.54 | 73.09 |
| Pr          | 8.21       | 8.70 | 6.05 | 7.52  | 7.68 | 6.87  | 7.93 | 7.80  | 8.98 | 8.91 | 7.80 | 8.58 | 8.25 | 8.11  | 7.98  | 7.72  | 8.64  | 9.51  | 8.13  | 8.32  | 8.65  | 9.63  | 8.50  | 7.93  |
| Nd          | 29.4       | 31.0 | 23.1 | 27.81 | 28.6 | 25.78 | 28.8 | 28.48 | 32.4 | 32.2 | 28.8 | 31.3 | 29.6 | 29.71 | 29.04 | 27.77 | 30.91 | 34.50 | 31.29 | 31.17 | 32.12 | 35.56 | 32.10 | 29.58 |
| Sm          | 5.53       | 5.84 | 4.82 | 5.36  | 5.82 | 5.07  | 5.25 | 5.36  | 5.99 | 5.74 | 5.55 | 5.97 | 5.49 | 5.61  | 5.56  | 5.20  | 5.56  | 6.56  | 6.35  | 6.21  | 6.15  | 6.71  | 6.56  | 5.75  |
| Eu          | 1.33       | 1.43 | 1.16 | 1.26  | 1.33 | 1.21  | 1.16 | 1.21  | 1.32 | 1.27 | 1.22 | 1.32 | 1.20 | 1.25  | 1.21  | 1.14  | 1.21  | 1.41  | 1.29  | 1.28  | 1.23  | 1.39  | 1.33  | 1.18  |
| Gd          | 4.85       | 5.26 | 4.44 | 4.89  | 5.22 | 4.68  | 4.65 | 4.83  | 5.18 | 4.98 | 4.84 | 5.33 | 4.85 | 5.09  | 5.11  | 4.77  | 4.96  | 6.00  | 5.81  | 5.65  | 5.52  | 6.18  | 6.04  | 5.29  |
| Tb          | 0.83       | 0.82 | 0.72 | 0.75  | 0.79 | 0.70  | 0.69 | 0.71  | 0.75 | 0.73 | 0.71 | 0.77 | 0.72 | 0.74  | 0.76  | 0.73  | 0.71  | 0.84  | 0.87  | 0.86  | 0.80  | 0.89  | 0.85  | 0.79  |
| Dy          | 4.03       | 4.31 | 3.84 | 4.07  | 4.33 | 3.99  | 3.84 | 3.92  | 4.28 | 4.22 | 3.96 | 4.29 | 4.07 | 4.13  | 4.35  | 4.32  | 3.99  | 4.71  | 5.00  | 4.89  | 4.53  | 5.08  | 4.83  | 4.54  |
| Ho          | 0.91       | 0.93 | 0.83 | 0.86  | 0.90 | 0.85  | 0.79 | 0.79  | 0.86 | 0.87 | 0.81 | 0.86 | 0.84 | 0.83  | 0.88  | 0.92  | 0.81  | 0.96  | 1.01  | 1.00  | 0.94  | 1.06  | 0.96  | 0.94  |
| Er          | 2.44       | 2.54 | 2.31 | 2.43  | 2.59 | 2.43  | 2.30 | 2.22  | 2.49 | 2.57 | 2.34 | 2.48 | 2.46 | 2.43  | 2.54  | 2.65  | 2.37  | 2.79  | 2.97  | 2.89  | 2.75  | 3.09  | 2.81  | 2.81  |
| Tm          | 0.44       | 0.42 | 0.38 | 0.40  | 0.41 | 0.37  | 0.35 | 0.33  | 0.36 | 0.38 | 0.33 | 0.36 | 0.37 | 0.36  | 0.38  | 0.39  | 0.35  | 0.41  | 0.44  | 0.43  | 0.40  | 0.44  | 0.41  | 0.40  |
| Yb          | 2.30       | 2.28 | 2.15 | 2.27  | 2.42 | 2.25  | 2.12 | 2.09  | 2.26 | 2.43 | 2.14 | 2.29 | 2.33 | 2.25  | 2.34  | 2.45  | 2.22  | 2.68  | 2.72  | 2.73  | 2.60  | 2.85  | 2.61  | 2.61  |
| Lu          | 0.43       | 0.40 | 0.36 | 0.37  | 0.39 | 0.34  | 0.33 | 0.32  | 0.35 | 0.37 | 0.33 | 0.35 | 0.36 | 0.34  | 0.35  | 0.37  | 0.34  | 0.42  | 0.42  | 0.42  | 0.39  | 0.43  | 0.40  | 0.39  |
| Hf          | 6.66       | 2.95 | 2.81 | 2.88  | 2.61 | 2.87  | 2.61 | 2.81  | 2.94 | 3.63 | 2.84 | 3.13 | 3.27 | 3.27  | 3.15  | 3.09  | 3.50  | 2.66  | 6.43  | 5.20  | 4.63  | 6.15  | 5.33  | 5.79  |
| Ta          | 3.27       | 1.77 | 1.15 | 1.17  | 1.12 | 1.04  | 1.04 | 1.02  | 1.06 | 1.19 | 0.99 | 1.03 | 1.02 | 1.09  | 1.14  | 0.94  | 0.99  | 0.93  | 1.00  | 1.07  | 1.02  | 1.00  | 0.95  | 0.95  |
| Ph          | 24.6       | 19.0 | 16.4 | 17.66 | 26.1 | 20.45 | 20.4 | 22.50 | 24.1 | 25.0 | 23.5 | 26.2 | 21.6 | 24.32 | 23.06 | 22.74 | 23.57 | 21.72 | 18.59 | 21.47 | 20.31 | 22.04 | 18.89 | 17.61 |
| Th          | 18.0       | 15.5 | 11.3 | 14.06 | 14.4 | 13.06 | 14.0 | 14.10 | 15.7 | 15.7 | 14.5 | 15.3 | 14.9 | 14.32 | 13.39 | 14.30 | 15.35 | 15.89 | 14.80 | 15.09 | 14.86 | 16.32 | 14.53 | 14.51 |
| U           | 8.58       | 6.88 | 7.04 | 9.83  | 8.21 | 7.17  | 7.14 | 6.94  | 6.89 | 6.80 | 6.01 | 6.92 | 6.50 | 7.41  | 6.10  | 6.09  | 7.27  | 7.84  | 7.45  | 9.05  | 8.95  | 8.48  | 5.05  | 6.44  |

|       |            |      |      |       |      |       |      |       |      |      |      |      |      |       |       |       |       |       |       |       |       |       |       |       |
|-------|------------|------|------|-------|------|-------|------|-------|------|------|------|------|------|-------|-------|-------|-------|-------|-------|-------|-------|-------|-------|-------|
| ΣREF  | 169        | 180  | 132  | 157.0 | 161  | 146.3 | 165  | 161.1 | 185  | 184  | 162  | 176  | 169  | 167.1 | 162.0 | 162.5 | 176.6 | 194.5 | 172.1 | 171.1 | 176.1 | 199.1 | 179.3 | 167.2 |
| I/H   | 9.45       | 9.65 | 7.80 | 8.79  | 8.49 | 8.37  | 9.96 | 9.60  | 10.2 | 10.1 | 9.52 | 9.55 | 9.58 | 9.34  | 8.70  | 8.79  | 10.21 | 9.34  | 7.95  | 8.07  | 8.82  | 8.94  | 8.48  | 8.41  |
| Eu/E  | 0.79       | 0.79 | 0.77 | 0.75  | 0.74 | 0.76  | 0.72 | 0.73  | 0.72 | 0.73 | 0.72 | 0.72 | 0.71 | 0.72  | 0.69  | 0.70  | 0.70  | 0.69  | 0.65  | 0.66  | 0.65  | 0.66  | 0.65  | 0.65  |
| Ce/Ce | 1.04       | 1.01 | 1.23 | 1.08  | 1.05 | 1.14  | 1.07 | 1.04  | 1.04 | 1.06 | 1.05 | 0.99 | 1.02 | 1.04  | 0.94  | 1.02  | 1.01  | 0.96  | 1.08  | 1.03  | 1.01  | 1.02  | 1.09  | 1.11  |
| LaN/Y | 10.3       | 11.6 | 7.07 | 9.11  | 8.99 | 8.12  | 10.8 | 10.80 | 11.7 | 10.7 | 10.5 | 11.1 | 10.3 | 10.27 | 10.28 | 9.52  | 11.65 | 10.80 | 8.07  | 8.32  | 9.36  | 9.81  | 8.88  | 8.25  |
| Zr/Sc | 7.65       | 7.89 | 13.5 | 8.53  | 7.70 | 11.09 | 7.67 | 8.14  | 8.09 | 9.86 | 9.13 | 8.58 | 9.60 | 10.51 | 10.20 | 9.43  | 10.12 | 7.15  | 25.63 | 18.02 | 16.25 | 19.66 | 21.50 | 25.88 |
| Th/Sc | 1.48       | 1.35 | 1.76 | 1.33  | 1.37 | 1.60  | 1.27 | 1.30  | 1.26 | 1.29 | 1.42 | 1.25 | 1.34 | 1.42  | 1.31  | 1.29  | 1.27  | 1.29  | 1.70  | 1.50  | 1.40  | 1.53  | 1.67  | 1.86  |
| Elem  | Sample no. |      |      |       |      |       |      |       |      |      |      |      |      |       |       |       |       |       |       |       |       |       |       |       |
| ent   | 25         | 26   | 27   | 28    | 29   | 30    | 31   | 32    | 33   | 34   | 35   | 36   | 37   | 38    | 39    | 40    | 41    | 42    | 43    | 44    | 45    | 46    | 47    | 48    |
| Li    | 35.7       | 43.7 | 31.9 | 32.47 | 33.8 | 35.17 | 37.5 | 33.23 | 18.4 | 33.4 | 26.7 | 30.9 | 32.6 | 26.72 | 30.15 | 25.84 | 24.36 | 26.00 | 29.85 | 22.11 | 22.54 | 23.75 | 22.55 | 23.52 |
| Be    | 2.82       | 3.03 | 2.89 | 2.65  | 2.57 | 2.60  | 2.75 | 2.60  | 2.28 | 2.54 | 1.97 | 2.01 | 2.70 | 3.32  | 2.88  | 2.37  | 2.12  | 1.97  | 3.04  | 1.43  | 1.88  | 2.13  | 1.85  | 2.23  |
| Sc    | 9.68       | 8.62 | 8.84 | 8.63  | 8.90 | 8.28  | 11.0 | 8.99  | 7.19 | 9.54 | 8.61 | 8.44 | 9.66 | 10.86 | 11.21 | 9.44  | 8.00  | 7.20  | 8.63  | 5.44  | 6.48  | 7.47  | 6.50  | 6.91  |
| V     | 117        | 114  | 116  | 122.4 | 111  | 115.2 | 134  | 121.7 | 54.8 | 114  | 101  | 118  | 168  | 164.1 | 163.7 | 142.0 | 168.7 | 173.4 | 180.7 | 164.7 | 180.4 | 163.2 | 184.3 | 182.3 |
| Cr    | 60.9       | 47.7 | 60.5 | 57.86 | 57.0 | 57.28 | 66.6 | 58.37 | 23.9 | 54.8 | 53.4 | 47.9 | 63.1 | 49.87 | 65.26 | 54.36 | 46.78 | 42.86 | 63.21 | 33.61 | 41.14 | 41.31 | 41.35 | 43.97 |
| Mn    | 249        | 210  | 403  | 222.7 | 237  | 246.4 | 234  | 205.6 | 122  | 159  | 111  | 140  | 195  | 230.5 | 131.7 | 119.0 | 167.1 | 108.4 | 140.2 | 245.1 | 152.0 | 213.2 | 146.1 | 138.3 |
| Co    | 12.9       | 10.6 | 14.8 | 13.19 | 13.0 | 13.07 | 13.2 | 14.38 | 8.39 | 12.7 | 13.0 | 11.6 | 13.3 | 13.51 | 15.75 | 12.25 | 12.71 | 9.65  | 14.97 | 8.05  | 9.59  | 10.48 | 10.15 | 12.61 |
| Ni    | 57.7       | 50.8 | 51.3 | 57.09 | 62.9 | 58.68 | 72.5 | 67.65 | 45.6 | 60.2 | 62.5 | 56.4 | 76.3 | 76.56 | 73.04 | 63.57 | 92.41 | 92.75 | 90.87 | 93.57 | 99.94 | 82.29 | 103.4 | 97.38 |
| Cu    | 37.8       | 33.9 | 52.4 | 44.16 | 41.0 | 39.49 | 43.2 | 48.92 | 48.3 | 44.2 | 66.9 | 46.5 | 54.1 | 50.68 | 76.73 | 56.90 | 65.75 | 49.28 | 68.43 | 40.90 | 47.57 | 52.22 | 53.75 | 66.72 |
| Zn    | 110        | 110  | 68.8 | 96.42 | 80.1 | 82.86 | 83.1 | 72.52 | 172  | 164  | 45.6 | 120  | 92.0 | 112.9 | 76.11 | 84.21 | 141.6 | 87.86 | 226.7 | 68.49 | 103.4 | 56.81 | 139.4 | 72.38 |
| Ga    | 17.3       | 18.0 | 16.9 | 15.91 | 16.0 | 16.24 | 17.9 | 15.92 | 14.9 | 15.5 | 13.0 | 12.9 | 16.3 | 19.29 | 17.29 | 14.31 | 11.81 | 10.90 | 15.99 | 8.19  | 9.95  | 11.03 | 9.71  | 11.19 |
| Rh    | 85.1       | 46.9 | 85.8 | 62.51 | 65.6 | 81.72 | 145  | 62.72 | 105  | 94.7 | 113  | 109  | 128  | 113.2 | 137.9 | 129.6 | 101.7 | 95.26 | 47.99 | 67.09 | 80.72 | 93.34 | 80.12 | 94.74 |
| Sr    | 146        | 108  | 148  | 124.5 | 135  | 143.3 | 153  | 116.6 | 86.7 | 114  | 87.1 | 99.4 | 127  | 108.1 | 108.1 | 103.0 | 118.1 | 90.87 | 86.20 | 135.3 | 126.3 | 153.7 | 134.0 | 144.2 |
| Y     | 23.3       | 23.2 | 24.4 | 25.03 | 23.8 | 24.58 | 26.7 | 23.29 | 14.4 | 22.8 | 19.0 | 23.2 | 28.5 | 20.18 | 28.08 | 20.07 | 31.07 | 21.00 | 21.89 | 23.95 | 20.62 | 23.62 | 20.92 | 22.09 |
| Zr    | 177        | 173  | 143  | 148.3 | 189  | 173.8 | 180  | 144.6 | 109  | 133  | 75.7 | 81.1 | 144  | 124.3 | 100.1 | 79.41 | 81.84 | 64.55 | 104.1 | 57.71 | 62.93 | 64.66 | 61.06 | 71.92 |
| Nb    | 13.0       | 12.0 | 13.3 | 12.51 | 12.5 | 13.24 | 13.0 | 12.45 | 5.74 | 11.6 | 8.86 | 9.49 | 12.0 | 11.01 | 11.68 | 9.94  | 8.79  | 7.37  | 11.92 | 5.98  | 7.13  | 7.93  | 7.10  | 8.25  |
| Sn    | 3.06       | 5.60 | 2.85 | 2.76  | 2.75 | 2.75  | 2.90 | 2.68  | 3.31 | 2.82 | 2.14 | 2.29 | 2.74 | 3.45  | 2.66  | 2.57  | 1.87  | 1.80  | 2.90  | 1.32  | 1.48  | 1.75  | 1.53  | 1.66  |
| Cs    | 9.39       | 8.29 | 9.90 | 8.66  | 8.02 | 8.71  | 10.2 | 8.17  | 9.54 | 8.84 | 7.86 | 7.66 | 10.1 | 12.28 | 11.19 | 9.43  | 7.44  | 6.75  | 7.83  | 4.42  | 5.94  | 6.48  | 5.55  | 6.56  |
| Ba    | 2004       | 2450 | 2053 | 1727  | 1779 | 1879  | 2343 | 1891  | 1452 | 2133 | 2077 | 2054 | 2301 | 3128  | 2511  | 2333  | 1902  | 1862  | 2061  | 1532  | 1695  | 1817  | 1674  | 1811  |
| La    | 33.6       | 30.5 | 31.7 | 31.12 | 31.8 | 33.45 | 40.7 | 30.38 | 16.3 | 33.6 | 28.9 | 29.7 | 38.7 | 26.85 | 40.39 | 33.76 | 34.52 | 27.12 | 28.84 | 23.26 | 25.45 | 28.60 | 25.94 | 29.21 |
| Ce    | 76.2       | 64.8 | 73.2 | 69.07 | 69.5 | 72.97 | 78.8 | 63.19 | 34.8 | 67.4 | 55.1 | 57.8 | 75.7 | 51.31 | 76.79 | 63.50 | 64.70 | 51.80 | 58.23 | 44.46 | 47.44 | 52.97 | 49.55 | 54.52 |
| Pr    | 8.35       | 7.73 | 7.84 | 7.66  | 7.77 | 8.09  | 9.04 | 7.31  | 4.18 | 7.73 | 6.39 | 6.84 | 8.70 | 6.26  | 9.04  | 7.31  | 7.54  | 6.14  | 6.89  | 5.51  | 5.66  | 6.23  | 5.76  | 6.47  |
| Nd    | 31.5       | 29.2 | 29.3 | 29.20 | 29.1 | 30.33 | 32.4 | 27.73 | 15.4 | 28.4 | 23.1 | 25.5 | 31.8 | 22.97 | 33.45 | 26.01 | 28.47 | 22.90 | 25.66 | 21.33 | 21.16 | 23.49 | 21.47 | 23.68 |
| Sm    | 6.14       | 5.92 | 5.75 | 5.70  | 5.70 | 5.82  | 5.94 | 5.44  | 3.06 | 5.40 | 4.36 | 5.03 | 5.95 | 4.47  | 6.52  | 4.76  | 5.64  | 4.46  | 4.96  | 4.43  | 4.03  | 4.53  | 4.07  | 4.50  |
| Eu    | 1.25       | 1.09 | 1.24 | 1.17  | 1.16 | 1.21  | 1.29 | 1.14  | 0.68 | 1.13 | 0.94 | 1.10 | 1.28 | 1.04  | 1.34  | 1.01  | 1.32  | 0.95  | 1.09  | 1.01  | 0.91  | 1.01  | 0.93  | 1.00  |
| Gd    | 5.39       | 5.41 | 5.16 | 5.29  | 5.06 | 5.29  | 5.56 | 4.99  | 2.91 | 5.00 | 3.90 | 4.80 | 5.49 | 4.06  | 5.88  | 4.23  | 5.77  | 4.18  | 4.57  | 4.49  | 3.86  | 4.44  | 4.00  | 4.33  |
| Th    | 0.76       | 0.78 | 0.76 | 0.77  | 0.74 | 0.76  | 0.79 | 0.71  | 0.45 | 0.72 | 0.56 | 0.70 | 0.80 | 0.60  | 0.84  | 0.61  | 0.83  | 0.61  | 0.67  | 0.64  | 0.56  | 0.64  | 0.58  | 0.61  |
| Dv    | 4.28       | 4.39 | 4.40 | 4.46  | 4.21 | 4.28  | 4.60 | 4.07  | 2.68 | 4.06 | 3.25 | 4.08 | 4.69 | 3.50  | 4.73  | 3.48  | 4.78  | 3.47  | 3.86  | 3.64  | 3.21  | 3.68  | 3.28  | 3.47  |
| Ho    | 0.86       | 0.88 | 0.91 | 0.90  | 0.85 | 0.88  | 0.95 | 0.82  | 0.54 | 0.81 | 0.66 | 0.81 | 0.96 | 0.72  | 0.95  | 0.70  | 0.98  | 0.70  | 0.79  | 0.74  | 0.66  | 0.76  | 0.66  | 0.71  |
| Er    | 2.52       | 2.50 | 2.70 | 2.64  | 2.51 | 2.59  | 2.75 | 2.41  | 1.61 | 2.39 | 1.87 | 2.33 | 2.84 | 2.07  | 2.74  | 2.07  | 2.82  | 1.98  | 2.32  | 2.13  | 1.89  | 2.21  | 1.89  | 2.02  |
| Tm    | 0.37       | 0.37 | 0.39 | 0.40  | 0.36 | 0.38  | 0.40 | 0.35  | 0.24 | 0.35 | 0.27 | 0.33 | 0.41 | 0.30  | 0.39  | 0.29  | 0.39  | 0.29  | 0.34  | 0.29  | 0.27  | 0.32  | 0.27  | 0.28  |
| Yb    | 2.37       | 2.32 | 2.59 | 2.51  | 2.32 | 2.43  | 2.52 | 2.27  | 1.46 | 2.22 | 1.69 | 2.06 | 2.67 | 1.93  | 2.45  | 1.93  | 2.47  | 1.74  | 2.19  | 1.86  | 1.72  | 2.04  | 1.61  | 1.76  |

|       |      |      |      |       |      |       |      |       |      |      |      |      |      |       |       |       |       |       |       |       |       |       |       |       |
|-------|------|------|------|-------|------|-------|------|-------|------|------|------|------|------|-------|-------|-------|-------|-------|-------|-------|-------|-------|-------|-------|
| Li    | 0.36 | 0.35 | 0.40 | 0.38  | 0.35 | 0.36  | 0.38 | 0.34  | 0.21 | 0.33 | 0.25 | 0.31 | 0.39 | 0.28  | 0.36  | 0.29  | 0.37  | 0.27  | 0.33  | 0.28  | 0.26  | 0.31  | 0.24  | 0.26  |
| Hf    | 5.22 | 5.73 | 4.13 | 4.36  | 5.36 | 4.92  | 5.03 | 4.18  | 5.03 | 3.75 | 2.18 | 2.26 | 4.19 | 5.10  | 2.78  | 2.18  | 2.18  | 1.83  | 2.95  | 1.51  | 1.69  | 1.82  | 1.63  | 1.97  |
| Ta    | 1.02 | 1.54 | 0.98 | 0.89  | 0.94 | 0.93  | 0.96 | 0.92  | 1.11 | 0.82 | 0.65 | 0.64 | 0.82 | 1.21  | 0.82  | 0.68  | 0.56  | 0.50  | 0.82  | 0.40  | 0.49  | 0.55  | 0.47  | 0.56  |
| Pb    | 19.9 | 16.7 | 25.3 | 17.79 | 18.8 | 17.85 | 19.3 | 20.63 | 21.7 | 20.0 | 30.9 | 18.1 | 18.0 | 27.77 | 26.75 | 21.36 | 19.37 | 14.44 | 18.84 | 11.74 | 11.07 | 16.27 | 13.92 | 18.87 |
| Th    | 15.4 | 20.9 | 13.8 | 13.10 | 14.4 | 13.87 | 15.6 | 13.31 | 22.7 | 13.3 | 10.6 | 10.5 | 13.1 | 18.56 | 13.86 | 11.56 | 9.46  | 8.85  | 10.99 | 6.78  | 8.47  | 9.08  | 7.93  | 9.45  |
| U     | 6.90 | 7.71 | 9.86 | 7.58  | 7.43 | 7.19  | 8.76 | 7.98  | 9.23 | 8.11 | 7.13 | 7.84 | 9.75 | 10.78 | 13.44 | 8.96  | 15.65 | 11.90 | 11.59 | 12.44 | 13.25 | 13.85 | 15.72 | 15.77 |
| ΣREF  | 174  | 156  | 166  | 161.2 | 161  | 168.8 | 186  | 151.1 | 84.6 | 159  | 131  | 141  | 180  | 126.3 | 185.8 | 149.9 | 160.6 | 126.6 | 140.7 | 114.0 | 117.0 | 131.2 | 120.2 | 132.8 |
| L/H   | 9.29 | 8.20 | 8.61 | 8.30  | 8.85 | 8.95  | 9.38 | 8.47  | 7.39 | 9.06 | 9.55 | 8.18 | 8.90 | 8.39  | 9.14  | 10.0  | 7.72  | 8.56  | 8.33  | 7.11  | 8.42  | 8.12  | 8.59  | 8.88  |
| Eu/E  | 0.66 | 0.59 | 0.70 | 0.65  | 0.66 | 0.67  | 0.69 | 0.67  | 0.70 | 0.66 | 0.70 | 0.68 | 0.68 | 0.75  | 0.66  | 0.69  | 0.71  | 0.67  | 0.70  | 0.69  | 0.71  | 0.69  | 0.70  | 0.69  |
| Ce/Ce | 1.09 | 1.02 | 1.12 | 1.08  | 1.06 | 1.07  | 0.99 | 1.02  | 1.01 | 1.01 | 0.98 | 0.98 | 0.99 | 0.95  | 0.97  | 0.97  | 0.97  | 0.97  | 0.99  | 0.95  | 0.95  | 0.96  | 0.98  | 0.95  |
| LaN/Y | 9.57 | 8.88 | 8.26 | 8.37  | 9.24 | 9.27  | 10.9 | 9.03  | 7.55 | 10.2 | 11.5 | 9.71 | 9.77 | 9.39  | 11.14 | 11.82 | 9.41  | 10.49 | 8.89  | 8.42  | 9.99  | 9.44  | 10.84 | 11.21 |
| Zr/Sc | 18.3 | 20.1 | 16.2 | 17.18 | 21.2 | 21.00 | 16.3 | 16.08 | 15.1 | 13.9 | 8.79 | 9.61 | 14.9 | 11.45 | 8.93  | 8.41  | 10.23 | 8.97  | 12.06 | 10.61 | 9.71  | 8.66  | 9.40  | 10.40 |
| Th/Sc | 1.60 | 2.43 | 1.56 | 1.52  | 1.62 | 1.68  | 1.41 | 1.48  | 3.16 | 1.40 | 1.24 | 1.25 | 1.36 | 1.71  | 1.24  | 1.22  | 1.18  | 1.23  | 1.27  | 1.25  | 1.31  | 1.22  | 1.22  | 1.37  |

| Elem<br>ent | Sample no. |      |      |       |      |       |      |       |      |      |      |      |      |       |       |       |       |       |       |       | Aver  | PAA   | NAS  |     |
|-------------|------------|------|------|-------|------|-------|------|-------|------|------|------|------|------|-------|-------|-------|-------|-------|-------|-------|-------|-------|------|-----|
|             | 49         | 50   | 51   | 52    | 53   | 54    | 55   | 56    | 57   | 58   | 59   | 60   | 61   | 62    | 63    | 64    | 65    | 66    | 67    | 68    | 69    | age   | S    | C   |
| Li          | 23.3       | 22.4 | 21.7 | 14.83 | 18.2 | 24.56 | 23.9 | 26.88 | 28.6 | 28.9 | 39.5 | 39.3 | 38.2 | 47.45 | 46.62 | 53.32 | 49.54 | 48.11 | 50.07 | 46.70 | 37.98 | 34.93 | -    | -   |
| Be          | 1.91       | 2.46 | 1.55 | 3.89  | 1.72 | 2.40  | 2.51 | 1.92  | 1.80 | 3.25 | 2.60 | 2.92 | 2.43 | 3.06  | 2.82  | 3.48  | 2.64  | 2.72  | 2.35  | 3.13  | 2.45  | 2.67  | -    | -   |
| Sc          | 6.00       | 7.44 | 4.99 | 6.81  | 4.81 | 8.34  | 4.28 | 7.35  | 7.20 | 11.5 | 9.18 | 9.62 | 7.69 | 9.94  | 8.68  | 11.47 | 9.05  | 9.26  | 10.27 | 10.46 | 8.15  | 9.12  | 16   | 15  |
| V           | 161        | 227  | 158  | 173.4 | 236  | 175.7 | 151  | 292.6 | 97.4 | 292  | 148  | 138  | 89.7 | 121.4 | 120.8 | 107.0 | 81.25 | 86.68 | 87.52 | 71.43 | 88.04 | 139.1 | 96   | 130 |
| Cr          | 40.0       | 47.4 | 32.7 | 26.07 | 38.3 | 80.76 | 65.1 | 73.88 | 58.7 | 72.2 | 58.8 | 60.7 | 54.6 | 68.49 | 69.81 | 63.62 | 53.03 | 51.66 | 52.66 | 42.48 | 49.25 | 58.96 | 110  | 125 |
| Mn          | 155        | 197  | 167  | 284.3 | 304  | 218.7 | 350  | 189.3 | 381  | 388  | 401  | 573  | 1553 | 909.6 | 1350  | 694.1 | 1026  | 759.3 | 642.2 | 939.4 | 970.4 | 333.0 | -    | -   |
| Co          | 10.6       | 11.6 | 7.25 | 7.83  | 7.32 | 12.41 | 7.76 | 9.46  | 6.97 | 8.54 | 8.02 | 13.3 | 10.3 | 16.36 | 17.33 | 19.03 | 11.62 | 12.61 | 15.80 | 13.14 | 9.59  | 12.69 | 23   | 26  |
| Ni          | 107        | 114  | 92.2 | 87.91 | 111  | 98.16 | 64.4 | 103.1 | 64.0 | 89.3 | 45.4 | 52.8 | 39.6 | 54.71 | 54.77 | 62.69 | 37.95 | 43.62 | 50.12 | 45.87 | 35.22 | 67.93 | 55   | 58  |
| Cu          | 53.3       | 74.4 | 40.5 | 48.24 | 42.4 | 84.92 | 59.2 | 108.1 | 92.0 | 116  | 62.4 | 87.7 | 50.6 | 92.27 | 80.10 | 106.1 | 48.98 | 53.07 | 74.26 | 47.04 | 53.35 | 56.11 | 50   | -   |
| Zn          | 117        | 82.7 | 62.5 | 41.10 | 514  | 88.70 | 192  | 282.5 | 279  | 132  | 76.6 | 119  | 187  | 178.2 | 156.2 | 122.1 | 153.2 | 63.08 | 143.6 | 790.5 | 121.0 | 133.0 | 85   | -   |
| Ga          | 9.67       | 12.0 | 9.08 | 17.38 | 9.02 | 12.10 | 11.0 | 9.72  | 9.21 | 13.9 | 14.1 | 16.5 | 14.8 | 18.47 | 17.89 | 18.94 | 16.53 | 15.68 | 15.31 | 17.42 | 16.44 | 15.74 | -    | -   |
| Rb          | 77.9       | 97.7 | 64.6 | 79.77 | 69.1 | 100.9 | 94.8 | 89.04 | 85.2 | 115  | 126  | 152  | 134  | 133.2 | 116.4 | 58.36 | 131.8 | 60.06 | 118.3 | 72.75 | 113.5 | 92.56 | 160  | 125 |
| Sr          | 147        | 182  | 148  | 80.43 | 188  | 163.5 | 184  | 72.11 | 124  | 135  | 155  | 189  | 258  | 271.9 | 252.2 | 154.2 | 248.9 | 182.3 | 193.5 | 224.4 | 293.9 | 141.9 | 200  | 142 |
| Y           | 15.2       | 24.5 | 15.3 | 17.43 | 26.3 | 23.44 | 31.5 | 22.03 | 25.1 | 31.8 | 29.7 | 30.9 | 29.9 | 27.00 | 27.22 | 25.51 | 24.38 | 21.14 | 18.55 | 33.47 | 25.23 | 23.83 | -    | -   |
| Zr          | 29.8       | 84.8 | 74.8 | 136.0 | 80.4 | 70.62 | 129  | 69.58 | 65.3 | 132  | 100  | 137  | 107  | 129.3 | 125.6 | 139.5 | 134.9 | 122.9 | 109.0 | 267.4 | 196.9 | 117.7 | 210  | 200 |
| Nb          | 7.16       | 8.91 | 15.2 | 8.36  | 6.14 | 11.02 | 15.8 | 6.99  | 7.25 | 12.3 | 13.0 | 12.3 | 12.8 | 17.20 | 14.10 | 21.10 | 14.94 | 15.08 | 15.54 | 33.92 | 27.41 | 12.59 | 1.9  | 13  |
| Sn          | 1.52       | 1.77 | 1.74 | 3.57  | 1.30 | 2.57  | 1.78 | 1.68  | 1.63 | 2.66 | 2.66 | 3.18 | 2.49 | 3.18  | 2.78  | 5.39  | 3.12  | 3.02  | 2.88  | 3.77  | 2.97  | 2.83  | -    | -   |
| Cs          | 5.35       | 6.69 | 4.17 | 8.93  | 4.50 | 6.45  | 5.98 | 5.36  | 5.02 | 8.77 | 7.26 | 9.47 | 7.52 | 9.54  | 8.69  | 8.55  | 9.18  | 7.47  | 7.96  | 8.93  | 8.32  | 8.52  | -    | -   |
| Ba          | 1563       | 1833 | 1416 | 1525  | 1457 | 1527  | 1646 | 1444  | 1321 | 1776 | 1664 | 1974 | 1832 | 2210  | 2087  | 1646  | 1804  | 1183  | 1785  | 1613  | 2176  | 2042  | 650  | 636 |
| La          | 24.3       | 31.5 | 25.3 | 17.27 | 26.9 | 38.51 | 35.8 | 27.51 | 24.9 | 32.4 | 36.8 | 38.1 | 33.2 | 43.15 | 41.17 | 35.85 | 41.63 | 31.98 | 34.79 | 38.73 | 42.81 | 32.96 | 38.2 | 31  |
| Ce          | 44.6       | 58.4 | 45.6 | 36.22 | 50.9 | 82.93 | 73.8 | 52.52 | 45.4 | 61.2 | 72.8 | 86.8 | 81.5 | 107.4 | 98.76 | 95.41 | 99.28 | 91.12 | 80.31 | 124.2 | 97.67 | 69.78 | 79.6 | 67  |
| Pr          | 5.40       | 6.92 | 5.43 | 4.60  | 6.12 | 9.52  | 8.32 | 6.24  | 5.55 | 7.36 | 8.21 | 8.74 | 8.16 | 10.40 | 9.55  | 8.77  | 9.62  | 8.15  | 7.30  | 11.88 | 9.42  | 7.72  | 8.83 | -   |
| Nd          | 19.9       | 25.4 | 19.7 | 17.07 | 23.3 | 35.22 | 30.6 | 23.45 | 20.6 | 26.5 | 31.2 | 31.9 | 31.9 | 38.81 | 35.49 | 32.53 | 34.44 | 30.27 | 25.69 | 44.82 | 33.20 | 28.52 | 33.9 | 27  |
| Sm          | 3.72       | 4.92 | 3.82 | 3.19  | 4.50 | 6.67  | 5.73 | 4.77  | 4.21 | 5.22 | 7.15 | 6.39 | 7.32 | 7.55  | 7.07  | 6.39  | 6.28  | 5.68  | 4.74  | 8.51  | 6.14  | 5.51  | 5.55 | 5.6 |
| Eu          | 0.83       | 1.09 | 0.80 | 0.71  | 0.99 | 1.17  | 1.20 | 0.91  | 0.89 | 1.07 | 1.58 | 1.30 | 1.62 | 1.49  | 1.42  | 1.19  | 1.20  | 1.04  | 0.95  | 1.66  | 1.40  | 1.18  | 1.08 | 1.2 |
| Gd          | 3.40       | 4.73 | 3.65 | 2.88  | 4.58 | 5.92  | 5.69 | 4.73  | 4.35 | 5.04 | 7.46 | 6.18 | 7.49 | 6.77  | 6.66  | 5.68  | 5.60  | 4.95  | 4.21  | 7.06  | 5.73  | 5.09  | 4.66 | 5.2 |

|       |      |      |      |       |      |       |      |       |      |      |      |      |      |       |       |       |       |       |       |       |       |       |       |       |
|-------|------|------|------|-------|------|-------|------|-------|------|------|------|------|------|-------|-------|-------|-------|-------|-------|-------|-------|-------|-------|-------|
| Th    | 0.46 | 0.67 | 0.50 | 0.45  | 0.65 | 0.80  | 0.83 | 0.67  | 0.67 | 0.79 | 1.09 | 0.95 | 1.07 | 0.96  | 0.97  | 0.83  | 0.81  | 0.70  | 0.60  | 1.07  | 0.85  | 0.75  | 0.77  | -     |
| Dv    | 2.53 | 3.77 | 2.69 | 2.74  | 3.84 | 4.40  | 4.95 | 3.88  | 3.90 | 4.76 | 5.88 | 5.69 | 5.88 | 5.43  | 5.50  | 4.73  | 4.63  | 4.00  | 3.45  | 6.26  | 4.89  | 4.23  | 4.68  | -     |
| Ho    | 0.50 | 0.78 | 0.52 | 0.60  | 0.79 | 0.88  | 1.04 | 0.76  | 0.81 | 1.05 | 1.09 | 1.18 | 1.12 | 1.09  | 1.09  | 0.95  | 0.92  | 0.81  | 0.68  | 1.30  | 0.99  | 0.86  | 0.99  | -     |
| Er    | 1.43 | 2.23 | 1.44 | 1.91  | 2.32 | 2.38  | 3.08 | 2.10  | 2.31 | 3.16 | 2.89 | 3.54 | 3.08 | 3.05  | 3.09  | 2.79  | 2.67  | 2.35  | 2.00  | 3.73  | 2.81  | 2.49  | 2.85  | -     |
| Tm    | 0.20 | 0.32 | 0.21 | 0.30  | 0.33 | 0.34  | 0.44 | 0.30  | 0.32 | 0.48 | 0.39 | 0.52 | 0.44 | 0.45  | 0.43  | 0.41  | 0.39  | 0.34  | 0.29  | 0.53  | 0.41  | 0.36  | 0.41  | -     |
| Yb    | 1.24 | 2.04 | 1.25 | 1.96  | 2.03 | 2.18  | 2.68 | 1.89  | 2.11 | 3.23 | 2.41 | 3.44 | 2.77 | 2.94  | 2.75  | 2.66  | 2.47  | 2.24  | 1.91  | 3.28  | 2.54  | 2.30  | 2.82  | 3.1   |
| Lu    | 0.19 | 0.30 | 0.18 | 0.29  | 0.30 | 0.34  | 0.39 | 0.29  | 0.31 | 0.49 | 0.37 | 0.52 | 0.43 | 0.44  | 0.41  | 0.40  | 0.37  | 0.33  | 0.28  | 0.46  | 0.37  | 0.35  | 0.43  | 0.46  |
| Hf    | 0.79 | 2.21 | 1.59 | 7.41  | 2.11 | 1.42  | 2.79 | 1.89  | 1.78 | 3.54 | 2.66 | 3.79 | 2.96 | 3.53  | 3.45  | 3.86  | 3.77  | 3.46  | 3.05  | 5.54  | 4.23  | 3.46  | 5     | 6.3   |
| Ta    | 0.47 | 0.59 | 0.40 | 1.35  | 0.43 | 0.60  | 1.12 | 0.53  | 0.48 | 0.82 | 0.75 | 0.88 | 0.86 | 1.20  | 0.98  | 1.51  | 1.07  | 1.04  | 1.19  | 1.43  | 1.43  | 0.96  | -     | 1.1   |
| Pb    | 13.2 | 19.7 | 10.6 | 33.69 | 11.4 | 16.93 | 11.0 | 22.38 | 12.5 | 18.4 | 19.5 | 36.4 | 34.9 | 65.22 | 40.96 | 64.74 | 42.22 | 26.22 | 49.06 | 121.0 | 24.58 | 24.40 | -     | -     |
| Th    | 7.98 | 9.81 | 6.78 | 17.03 | 7.34 | 10.37 | 6.90 | 8.43  | 7.50 | 12.7 | 10.6 | 12.3 | 11.1 | 14.09 | 12.91 | 16.94 | 14.46 | 14.34 | 14.23 | 14.78 | 12.24 | 13.09 | 14.6  | 12.3  |
| U     | 14.7 | 19.2 | 13.2 | 15.45 | 26.9 | 10.54 | 8.42 | 9.80  | 5.38 | 9.21 | 3.24 | 2.98 | 2.96 | 3.27  | 2.95  | 2.47  | 2.25  | 2.30  | 2.02  | 2.74  | 2.29  | 8.50  | 3.1   | 3     |
| ΣREF  | 108  | 143  | 111  | 90.19 | 127  | 191.2 | 174  | 130.0 | 116  | 152  | 179  | 195  | 186  | 229.9 | 214.3 | 198.6 | 210.3 | 183.9 | 167.1 | 253.4 | 209.2 | 162.1 | 184.7 | 140.5 |
| I/H   | 9.93 | 8.65 | 9.65 | 7.10  | 7.61 | 10.09 | 8.14 | 7.90  | 6.88 | 7.05 | 7.32 | 7.87 | 7.36 | 9.88  | 9.26  | 9.75  | 10.7  | 10.7  | 11.47 | 9.70  | 10.26 | 8.87  | 9.49  | 15.05 |
| Eu/E  | 0.71 | 0.69 | 0.66 | 0.72  | 0.67 | 0.57  | 0.64 | 0.59  | 0.64 | 0.64 | 0.66 | 0.63 | 0.67 | 0.64  | 0.63  | 0.60  | 0.62  | 0.60  | 0.65  | 0.65  | 0.72  | 0.68  | 0.65  | 0.68  |
| Ce/Ce | 0.94 | 0.95 | 0.94 | 0.98  | 0.95 | 1.04  | 1.03 | 0.96  | 0.93 | 0.95 | 1.01 | 1.14 | 1.19 | 1.22  | 1.20  | 1.30  | 1.19  | 1.36  | 1.21  | 1.39  | 1.17  | 1.05  | 1.04  | -     |
| La/Y  | 13.2 | 10.4 | 13.6 | 5.94  | 8.97 | 11.91 | 9.01 | 9.83  | 7.97 | 6.76 | 10.3 | 7.48 | 8.08 | 9.89  | 10.09 | 9.07  | 11.39 | 9.61  | 12.31 | 7.95  | 11.36 | 9.79  | 9.13  | 6.74  |
| Zr/Sc | 4.97 | 11.4 | 14.9 | 19.97 | 16.7 | 8.47  | 30.2 | 9.47  | 9.09 | 11.5 | 10.9 | 14.3 | 13.9 | 13.01 | 14.47 | 12.16 | 14.91 | 13.27 | 10.61 | 25.56 | 24.17 | 13.24 | 13.13 | 13.33 |
| Th/Sc | 1.33 | 1.32 | 1.36 | 2.50  | 1.53 | 1.24  | 1.61 | 1.15  | 1.04 | 1.11 | 1.16 | 1.28 | 1.45 | 1.42  | 1.49  | 1.48  | 1.60  | 1.55  | 1.39  | 1.41  | 1.50  | 1.45  | 0.91  | 0.82  |
